## CORRESPONDENCE

**Bradley J. Hindman, M.D.**

Department of Anesthesia  
University of Iowa College of Medicine  
Iowa City, Iowa 52242

**William L. Young, M.D.**

Department of Anesthesiology  
College of Physicians and Surgeons  
Columbia University  
New York, New York 10032

**David S. Warner, M.D.**

Department of Anesthesiology  
Duke University Medical Center  
Box 3094  
Durham, North Carolina 27710  
Warne002@mc.duke.edu

**Reference**

1. Guy J, Hindman BJ, Baker KZ, Borel CO, Maktabi M, Ostapovich N, Kirchner J, Todd MM, Fogarty-Mack P, Yancy V, Sokoll MD, McAllister A, Roland C, Young WL, Warner DS: Comparison of remifentanyl and fentanyl in patients undergoing craniotomy for supratentorial space-occupying lesions. *ANESTHESIOLOGY* 1997; 86:514-24

(Accepted for publication August 6, 1997.)

The editorial review for these letters was conducted by Lawrence J. Saidman, M.D.

Anesthesiology

1998; 88:272

© 1998 American Society of Anesthesiologists, Inc.

Lippincott-Raven Publishers

## The Risks of Central Neuraxial Anesthesia

*To the Editor:*—Ho *et al.*<sup>1</sup> report on the successful use of combined spinal and epidural anesthesia for the management of labor and delivery in a patient with idiopathic hypertrophic subaortic stenosis (IHSS).

Idiopathic hypertrophic subaortic stenosis, or hypertrophic obstructive cardiomyopathy (HOCM) as it also is known, is a cardiomyopathy characterized by asymmetric septal hypertrophy, and dynamic left ventricular outflow tract (LVOT) obstruction, which worsens with hypovolemia, increased left ventricular contractility, and vascular dilation.<sup>2</sup> The diagnosis is confirmed with two-dimensional echocardiography, and the LVOT gradient is quantified by Doppler echocardiography. Provocative testing with inhaled amyl nitrate is used to accentuate the gradient.

In the current case, the diagnosis of IHSS was made several years before pregnancy, but we are given no details regarding its severity; specifically, no mention is made of a "provoked" gradient at diagnosis. Without this information, the reader has no way of knowing what the severity of the condition was and therefore no way of knowing the risks of sympathetic blockade with neuraxial anesthesia. For the patient with the potential for severe LVOT obstruction, the risks of central neuraxial anesthesia are profound and should never be underestimated.

**Donald Oxorn, M.D., C.M., F.R.C.P.C.**

Department of Anaesthesia and the Division of  
Cardiology  
Sunnybrook Health Science Centre and the University  
of Toronto  
2075 Bayview Avenue  
Toronto, Ontario M4N 3M5  
Canada  
donald.oxorn@utoronto.ca

**References**

1. Ho KM, Ngan Kee WD, Poon MCM: Combined spinal and epidural anesthesia in a parturient with idiopathic hypertrophic subaortic stenosis. *ANESTHESIOLOGY* 1997; 87:168-9
2. Grigg LE, Wigle ED, Williams WG, Daniel LB, Rakowski H: Transesophageal Doppler echocardiography in obstructive hypertrophic cardiomyopathy: Clarification of pathophysiology and importance in intraoperative decision making. *J Am Coll Cardiol* 1992; 20:42-52

(Accepted for publication September 4, 1997.)

Anesthesiology

1998; 88:272-3

© 1998 American Society of Anesthesiologists, Inc.

Lippincott-Raven Publishers

*In Reply:*—We thank Dr. Oxorn for his interest in our report. During pregnancy, our patient's mild limitation of exercise tolerance remained essentially unchanged, and echocardiography showed a left ventricular outflow tract gradient of 15 mmHg.

Although the response to amyl nitrite may provide some measure of severity, its use is not universal, it is not commonly used in our institution, and there are few data to support its safe use in pregnancy. We concur with Dr. Oxorn that hypovolemia, in-
